# Supplementary material for: Modification of CoMoO4 by an Fe doping strategy for efficient electrolysis of water
Source: Royal Society of Chemistry journal article supplement (doi:10.1039/d4dt03252g), 2024-12-09
Supplement: d4dt03252g1.pdf [file d4dt03252g1.pdf]

### Supplementary Information

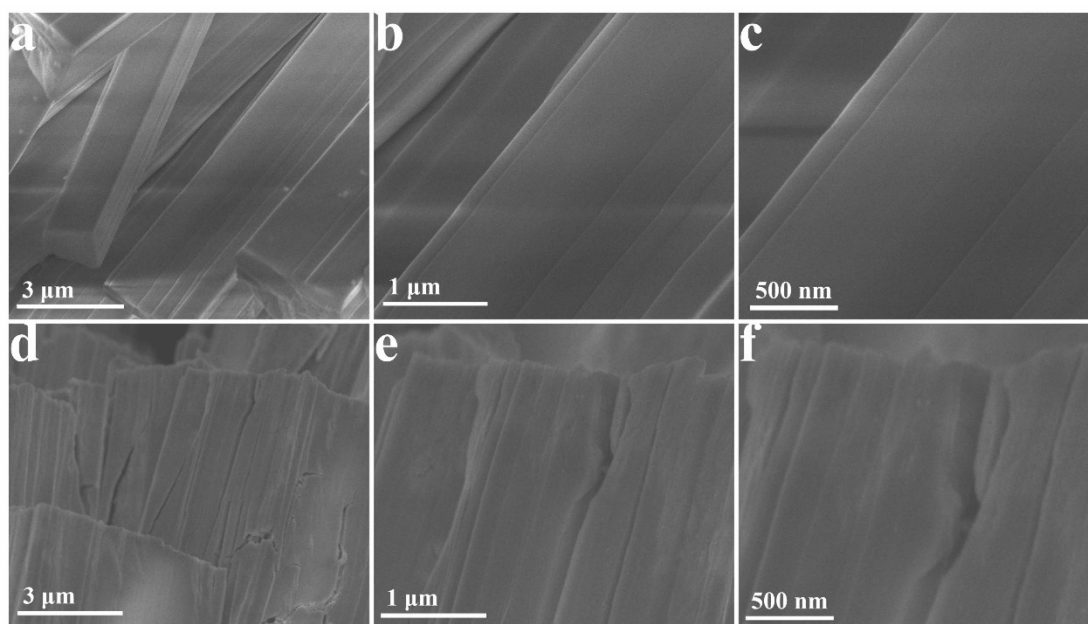

Fig. S1. SEM of (a~c)  $\text{CoMoO}_4 \cdot 0.75\text{H}_2\text{O}$ ; (d~f)  $\text{CoMoO}_4$ .

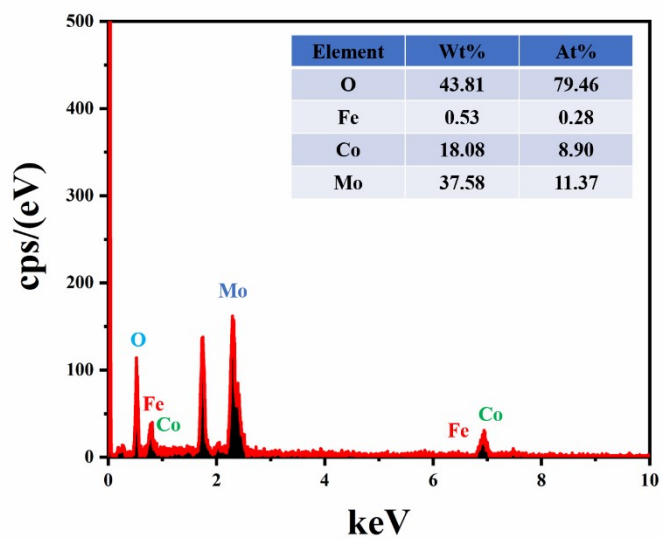

Fig. S2. EDX spectrum of  $\text{Fe-CoMoO}_4$ .

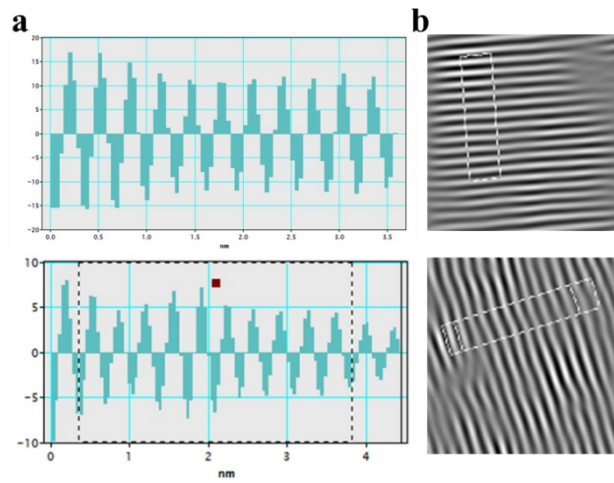

Fig. S3. HRTEM real-time profiles (a) IFFT image (b) of Fe-CoMoO<sub>4</sub> crystal.

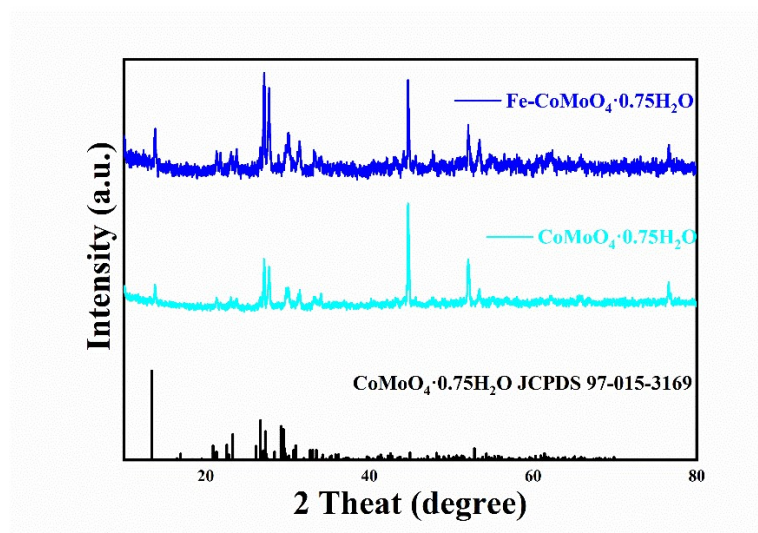

Fig. S4. XRD of Fe-CoMoO<sub>4</sub>·0.75H<sub>2</sub>O and CoMoO<sub>4</sub>·0.75H<sub>2</sub>O.

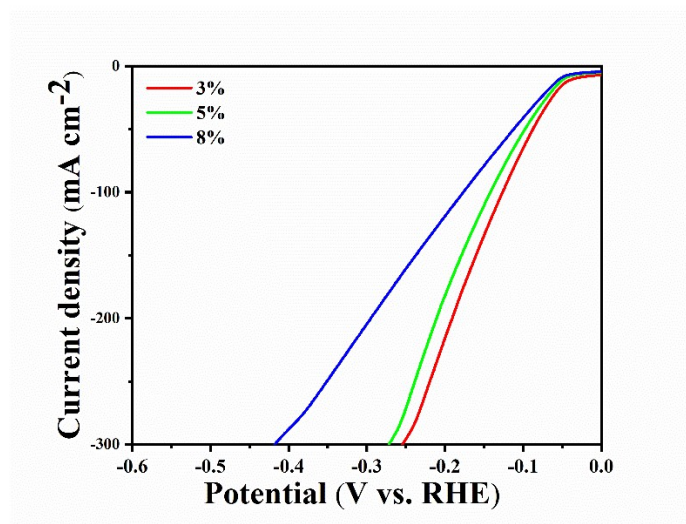

Fig. S5. The HER iR-corrected polarization curves of cobalt molybdate with different Fe doping (3, 5, 8% Fe) amounts 1 M KOH.

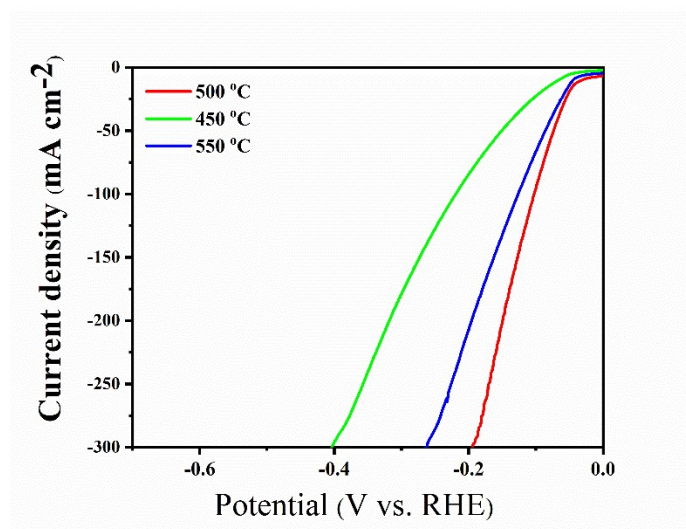

Fig. S6. The HER iR-corrected polarization curves of Fe-doped (3%) cobalt molybdate with different annealing temperatures (450, 500, or 550 °C) in 1 M KOH.

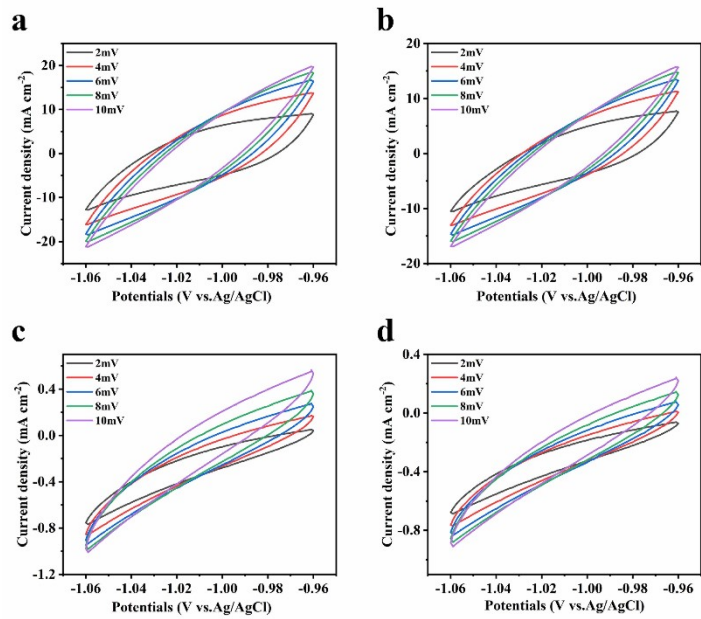

Fig. S7. Cyclic voltammograms curves of (a) Fe-CoMoO<sub>4</sub>, (b) CoMoO<sub>4</sub>, (c) Fe-CoMoO<sub>4</sub>·0.75H<sub>2</sub>O, and (d) CoMoO<sub>4</sub>·0.75H<sub>2</sub>O in region of -0.106~-0.96 V vs. Ag/AgCl at various scan rate.

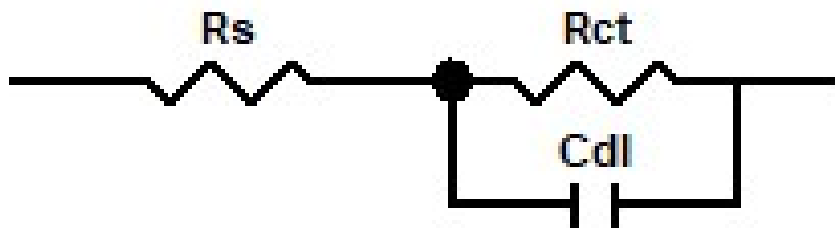

Fig. S8. Equivalent electrical circuit used to model the HER kinetics process,  $R_s$  is the solution resistance,  $R_{ct}$  is the charge transfer resistance at catalyst/electrolyte interface and  $C_{dl}$  is the double layer capacitance of the working electrode.

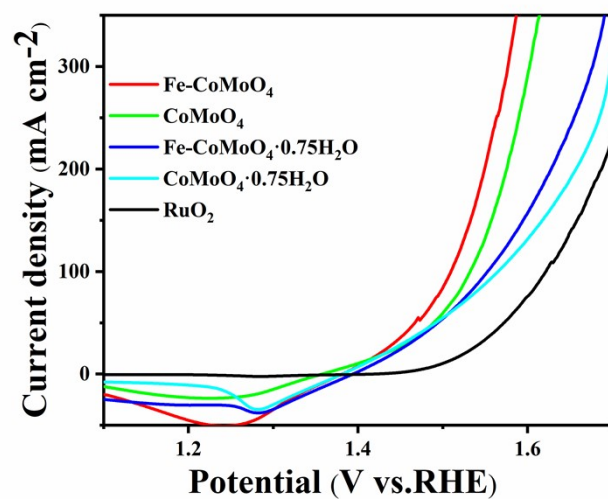

Fig. S9. OER LSV curves of Fe-CoMoO<sub>4</sub>, CoMoO<sub>4</sub>, Fe-CoMoO<sub>4</sub>·0.75H<sub>2</sub>O, CoMoO<sub>4</sub>·0.75H<sub>2</sub>O.

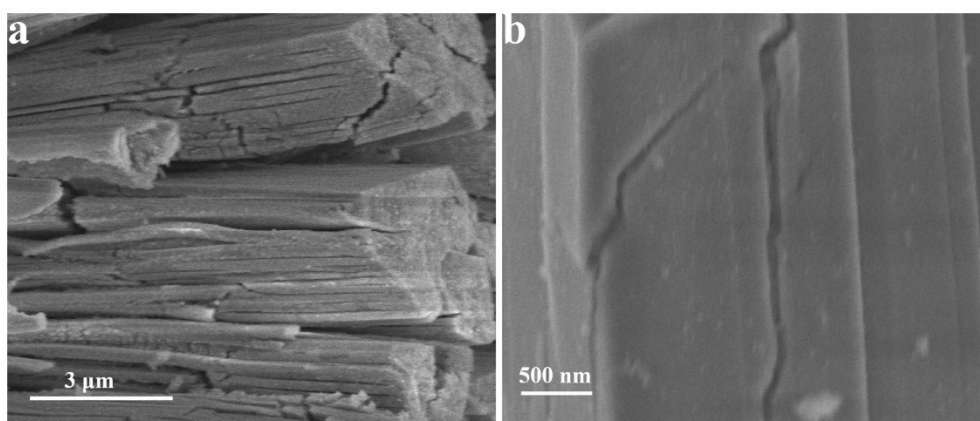

Fig. S10. SEM images of Fe-CoMoO<sub>4</sub> sample after stability test.

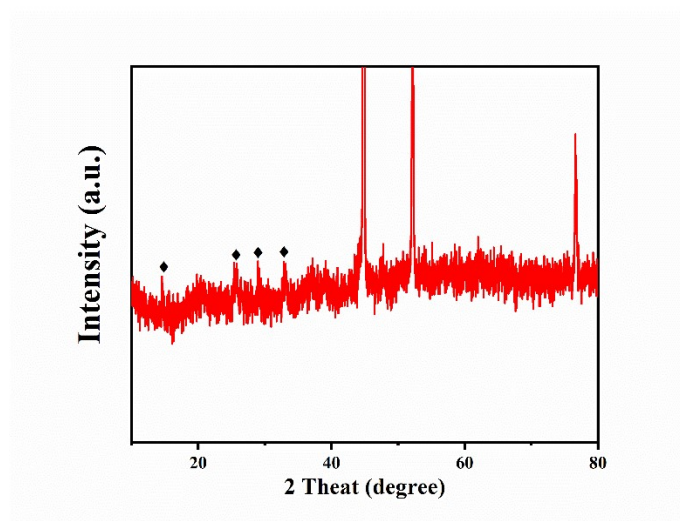

Fig. S11. XRD of Fe-CoMoO<sub>4</sub> sample after stability test.

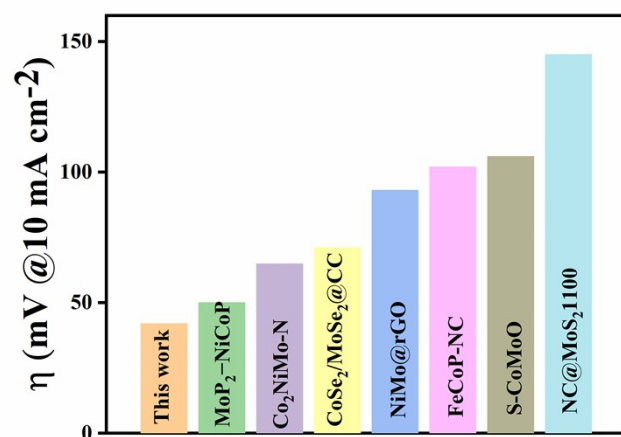

Fig. S12. Comparison of catalytic performance comparison of Fe-CoMoO<sub>4</sub> materials with other highly efficient transition metal-based catalysts in 1 M KOH for HER.
